# Supplementary material for: Progression from external pilot to definitive randomised controlled trial: a methodological review of progression criteria reporting
Source: BMJ Open. 2021 Jun 28;11(6):e048178. doi: 10.1136/bmjopen-2020-048178 (PMC8240572; doi:10.1136/bmjopen-2020-048178)
Supplement: Supplementary data [file bmjopen-2020-048178supp003.pdf]

**SUPPLEMENTARY FILE 3: INDICATOR OF FEASIBILITY CONTRIBUTING TO PROGRESSION CRITERIA**

| <b>Domain</b> | <b>Indicator of feasibility contributing to progression criteria</b>        | <b>Number of publications</b> |
|---------------|-----------------------------------------------------------------------------|-------------------------------|
| Management    | Data completion or missing data                                             | 38                            |
|               | Barriers or challenges to intervention implementation                       | 7                             |
|               | Develop or test training materials                                          | 4                             |
|               | Protocol components work together                                           | 2                             |
|               | Data analysis                                                               | 2                             |
|               | Data collection methods are suitable/fit for purpose                        | 1                             |
|               | Data management                                                             | 1                             |
|               | Time to Ethics approvals at each site                                       | 1                             |
|               | Time to readiness to initiate the clinical trial                            | 1                             |
| Process       | Recruitment rates                                                           | 113                           |
|               | Retention or attrition rate                                                 | 106                           |
|               | Non(compliance) or adherence rate (participants)                            | 66                            |
|               | Intervention acceptability or evaluation (patients)                         | 33                            |
|               | Withdrawal or completion rate (trial or intervention)                       | 22                            |
|               | Intervention acceptability or evaluation (non-patients)                     | 17                            |
|               | Consent or refusal rate                                                     | 16                            |
|               | Randomisation acceptability or rate                                         | 15                            |
|               | Intervention fidelity                                                       | 15                            |
|               | Understanding or acceptability of data collection tools/assessments/methods | 14                            |
|               | Non(compliance) or adherence rates (non-participants)                       | 12                            |
|               | Participant identification or screening                                     | 10                            |
|               | Eligibility rate                                                            | 9                             |
|               | Trial acceptability or evaluation (patients)                                | 8                             |
|               | Characteristics or properties of trial outcome measures                     | 7                             |
|               | Randomisation adequacy                                                      | 5                             |
|               | Crossover or contamination between arms                                     | 4                             |
|               | Enrolment rate                                                              | 5                             |
|               | Uptake or engagement rate                                                   | 3                             |
|               | Definitive study sample size is achievable                                  | 3                             |
|               | Trial acceptability or evaluation (non-patients)                            | 2                             |
|               | Success or failure rate                                                     | 2                             |
|               | Understanding or acceptability of study instructions                        | 2                             |
|               | Blinding procedures                                                         | 1                             |
|               | Eligibility criteria                                                        | 1                             |
|               | Describe control group                                                      | 2                             |
|               | Recruitment process                                                         | 2                             |
|               | Understanding or acceptability of study information                         | 1                             |
|               | Allocation concealment                                                      | 1                             |
|               | Intervention credibility                                                    | 1                             |
|               | Intervention suitability                                                    | 1                             |
|               | Completeness of biological sample collection                                | 1                             |
|               | Interest in using the intervention post-study                               | 1                             |
|               | Positive expected net gain of sampling from a definitive trial              | 1                             |

|            |                                                               |    |
|------------|---------------------------------------------------------------|----|
| Resources  | Centre or investigator recruitment, willingness or capacity   | 21 |
|            | Determining process time                                      | 7  |
|            | Collection of outcomes relevant to future economic evaluation | 4  |
|            | Equipment or resource reliability                             | 2  |
|            | Venue, location or setting appropriate                        | 1  |
|            | Determining capacity                                          | 1  |
|            | Intervention agreement between methods                        | 1  |
|            |                                                               |    |
| Scientific | Safety, adverse events, unintended consequences or harms      | 25 |
|            | Estimate of treatment effect                                  | 11 |
|            | Estimate of variance of treatment effect                      | 6  |
|            | Patient response                                              | 5  |
|            | Signal of efficacy                                            | 4  |
|            | Estimate intracluster correlation coefficient                 | 1  |
|            | Context and mechanisms of action                              | 1  |
|            | Intervention tolerability                                     | 1  |
